# Supplementary material for: estMOI: estimating multiplicity of infection using parasite deep sequencing data
Source: PubMed Central journal article supplement (PMC3998131; doi:10.1093/bioinformatics/btu005), 2014-01-17
Supplement: supp_btu005_SupplementaryMaterials.pdf [file supp_btu005_SupplementaryMaterials.pdf]

**Supplementary Table 1:** MOI estimates of two clonal samples (Sample 1 and Sample 2) and a mixed sample. The individual samples both had a MOI of one, where as the mixed sample had a MOI of 2. A minimum haplotype count of 3 and a percentile cutoff of 90 were used.

|                | <b>#MOI</b> | <b>Counts</b> | <b>%</b>    |                     |
|----------------|-------------|---------------|-------------|---------------------|
| <b>MIXED</b>   | 1           | 14356         | 0.71        |                     |
|                | <b>2</b>    | <b>5076</b>   | <b>0.96</b> | <b>MOI-estimate</b> |
|                | 3           | 618           | 0.99        |                     |
|                | 4           | 79            | 1.00        |                     |
|                | 5           | 28            | 1.00        |                     |
|                | >=6         | 8             | 1.00        |                     |
| <b>SAMPLE1</b> | <b>1</b>    | <b>9499</b>   | <b>0.91</b> | <b>MOI-estimate</b> |
|                | 2           | 915           | 1.00        |                     |
|                | 3           | 49            | 1.00        |                     |
|                | 4           | 2             | 1.00        |                     |
|                | 5           | 1             | 1.00        |                     |
|                | >=6         | 0             | 1.00        |                     |
| <b>SAMPLE2</b> | <b>1</b>    | <b>11812</b>  | <b>0.91</b> | <b>MOI-estimate</b> |
|                | 2           | 971           | 0.99        |                     |
|                | 3           | 120           | 1.00        |                     |
|                | 4           | 30            | 1.00        |                     |
|                | 5           | 6             | 1.00        |                     |
|                | >=6         | 0             | 1.00        |                     |

**Supplementary Table 2:** A list of 26 MOI informative genes (genes with high MOI across multiple sample). These genes could be used for future genotyping to estimate multiplicity in clinical *Plasmodium falciparum* samples.

| [Gene ID]     | [Genomic Location]                     |
|---------------|----------------------------------------|
| PF3D7_0211700 | Pf3D7_02_v3: 469,790 - 473,491 (+)     |
| PF3D7_0317300 | Pf3D7_03_v3: 699,544 - 709,728 (-)     |
| PF3D7_0403200 | Pf3D7_04_v3: 178,518 - 180,200 (+)     |
| PF3D7_0405300 | Pf3D7_04_v3: 282,403 - 288,297 (-)     |
| PF3D7_0410000 | Pf3D7_04_v3: 464,732 - 467,339 (-)     |
| PF3D7_0512800 | Pf3D7_05_v3: 548,406 - 553,340 (-)     |
| PF3D7_0605800 | Pf3D7_06_v3: 237,811 - 244,521 (-)     |
| PF3D7_0629700 | Pf3D7_06_v3: 1,221,941 - 1,242,922 (+) |
| PF3D7_0710200 | Pf3D7_07_v3: 463,105 - 471,837 (+)     |
| PF3D7_0715200 | Pf3D7_07_v3: 676,061 - 682,681 (-)     |
| PF3D7_0723800 | Pf3D7_07_v3: 993,232 - 1,000,233 (+)   |
| PF3D7_0807400 | Pf3D7_08_v3: 384,298 - 385,797 (+)     |
| PF3D7_0827300 | Pf3D7_08_v3: 1,181,295 - 1,183,796 (+) |
| PF3D7_1010400 | Pf3D7_10_v3: 415,404 - 417,471 (-)     |
| PF3D7_1131800 | Pf3D7_11_v3: 1,227,220 - 1,231,950 (-) |
| PF3D7_1229100 | Pf3D7_12_v3: 1,192,888 - 1,199,214 (-) |
| PF3D7_1240700 | Pf3D7_12_v3: 1,728,774 - 1,730,007 (+) |
| PF3D7_1243700 | Pf3D7_12_v3: 1,829,660 - 1,831,057 (+) |
| PF3D7_1322100 | Pf3D7_13_v3: 920,971 - 929,449 (+)     |
| PF3D7_1324300 | Pf3D7_13_v3: 1,002,748 - 1,019,303 (-) |
| PF3D7_1329800 | Pf3D7_13_v3: 1,265,137 - 1,268,763 (+) |
| PF3D7_1348400 | Pf3D7_13_v3: 1,935,596 - 1,947,380 (-) |
| PF3D7_1422400 | Pf3D7_14_v3: 900,386 - 905,278 (+)     |
| PF3D7_1448000 | Pf3D7_14_v3: 1,960,033 - 1,963,962 (-) |
| PF3D7_1472200 | Pf3D7_14_v3: 2,945,662 - 2,952,551 (+) |
| PF3D7_1472600 | Pf3D7_14_v3: 2,962,986 - 2,965,086 (-) |
